# Supplementary material for: Injectable and photocurable macromonomers synthesized using a heterometallic magnesium–titanium metal–organic catalyst for elastomeric polymer networks
Source: RSC Adv. 2023 Jun 19;13(27):18371–81. doi: 10.1039/d3ra02157b (PMC10277904; doi:10.1039/d3ra02157b)
Supplement: RA-013-D3RA02157B-s002 [file RA-013-D3RA02157B-s002.pdf]

# Injectable and photocurable macromonomers synthesized using a heterometallic magnesium-titanium metal-organic catalyst for elastomeric polymer networks

Malwina J. Niedźwiedź, Wojciech Ignaczak, Peter Sobolewski, Agata Goszczyńska, Gokhan

Demirci\*\*, Mirosława El Fray\*

Department of Polymer and Biomaterials Science, Faculty of Chemical Technology and Engineering, West Pomeranian University of Technology in Szczecin, Al. Piastow 45, 70-311 Szczecin, POLAND

\*Corresponding author:: mirfray@zut.edu.pl

\*\*Co-corresponding author: gdemirci@zut.edu.pl

## SUPPORTING INFORMATION

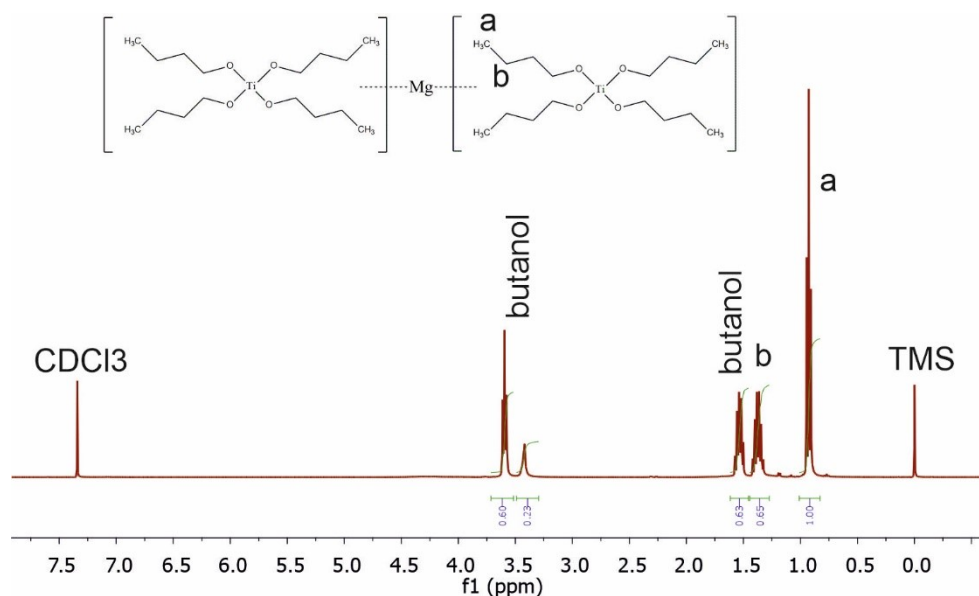

Figure S1  $^1\text{H}$  NMR of Mg-Ti butoxide catalyst

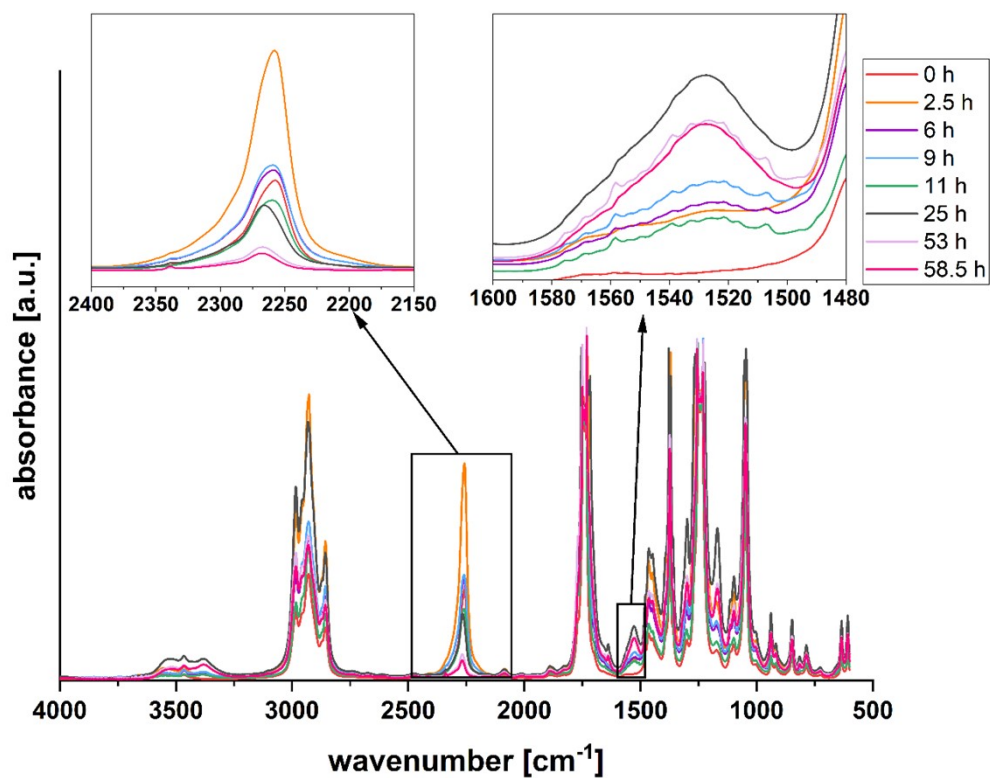

**Figure S2** Progress of the reaction with use of 0.1 mol% of catalyst

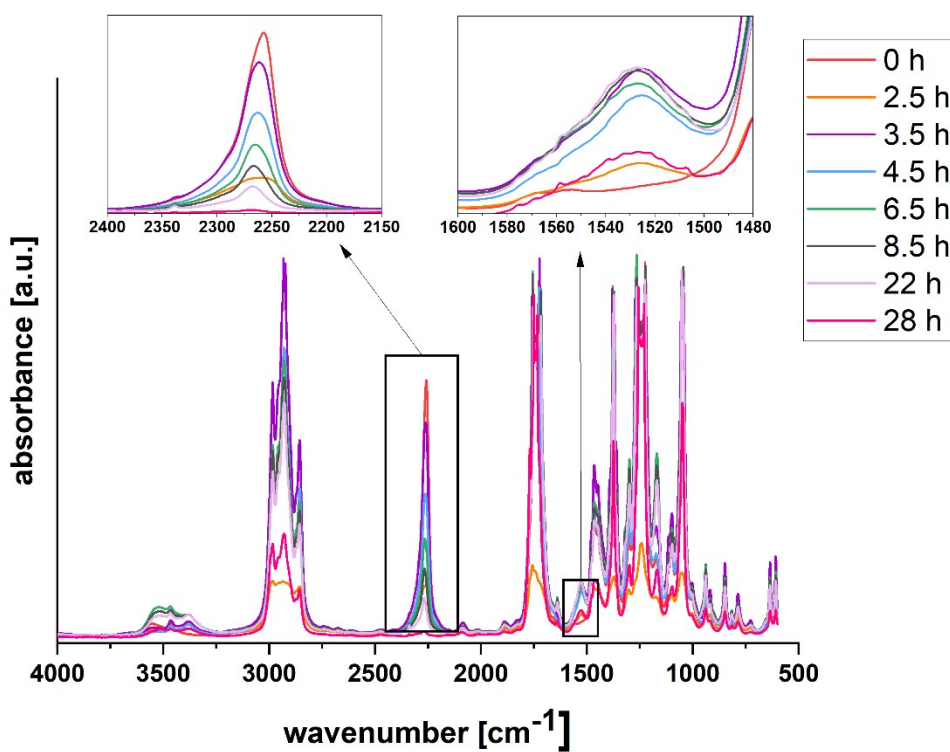

**Figure S3** Progress of the reaction with use of 0.25 mol% of catalyst

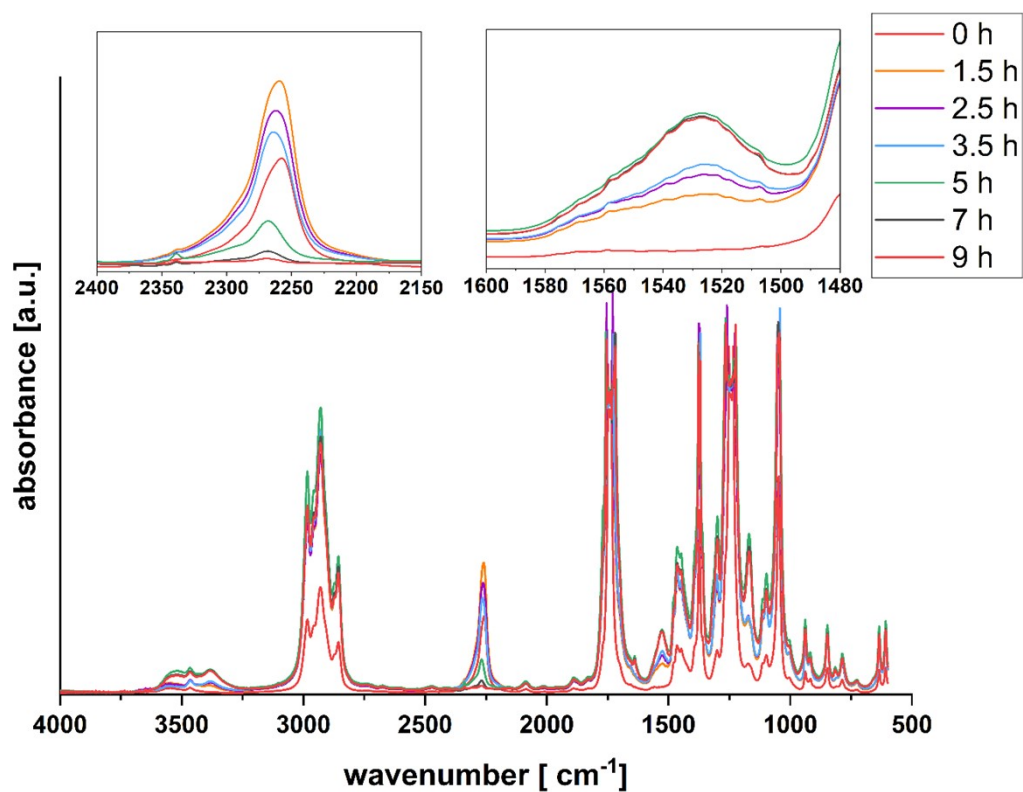

**Figure S4** Progress of the reaction with use of 0.5 mol% of catalyst

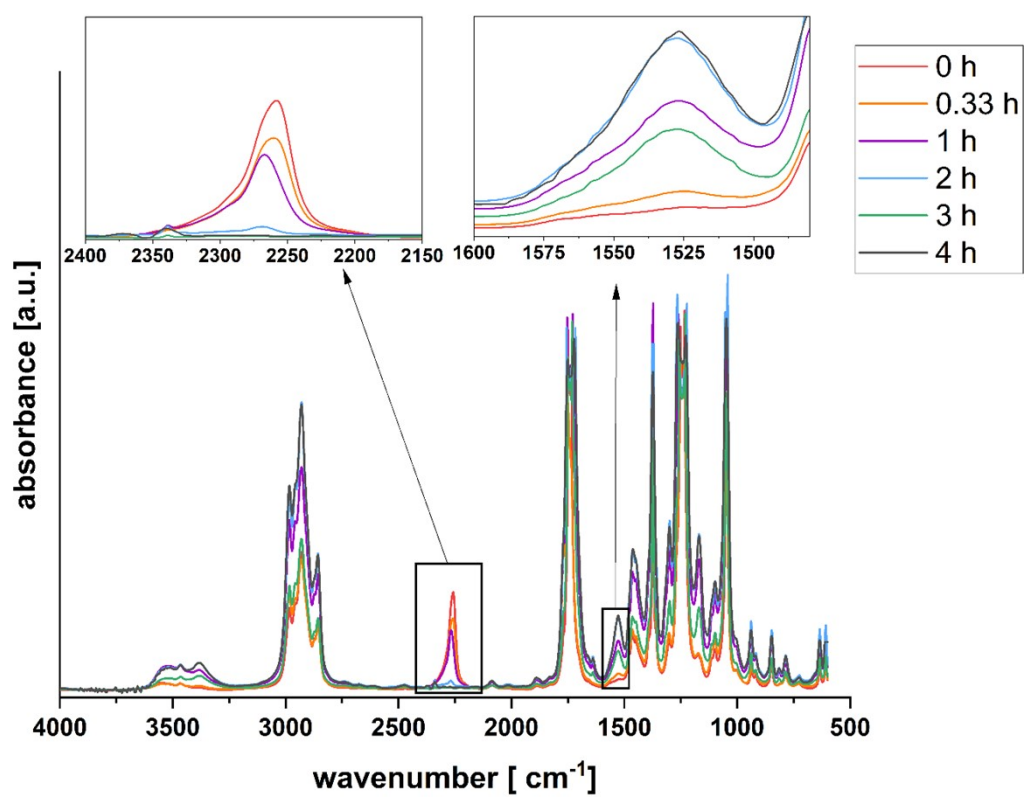

**Figure S5** Progress of the reaction with use of 1 mol% of catalyst

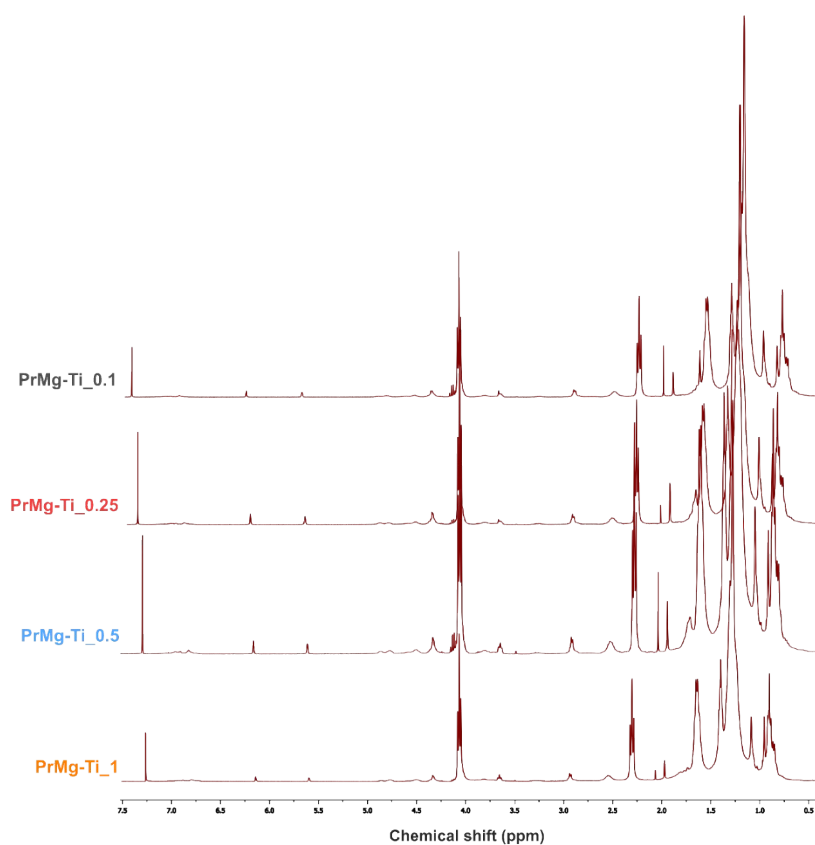

**Figure S6**  $^1\text{H}$  NMR of all macromonomers obtained with use of different catalyst concentrations.

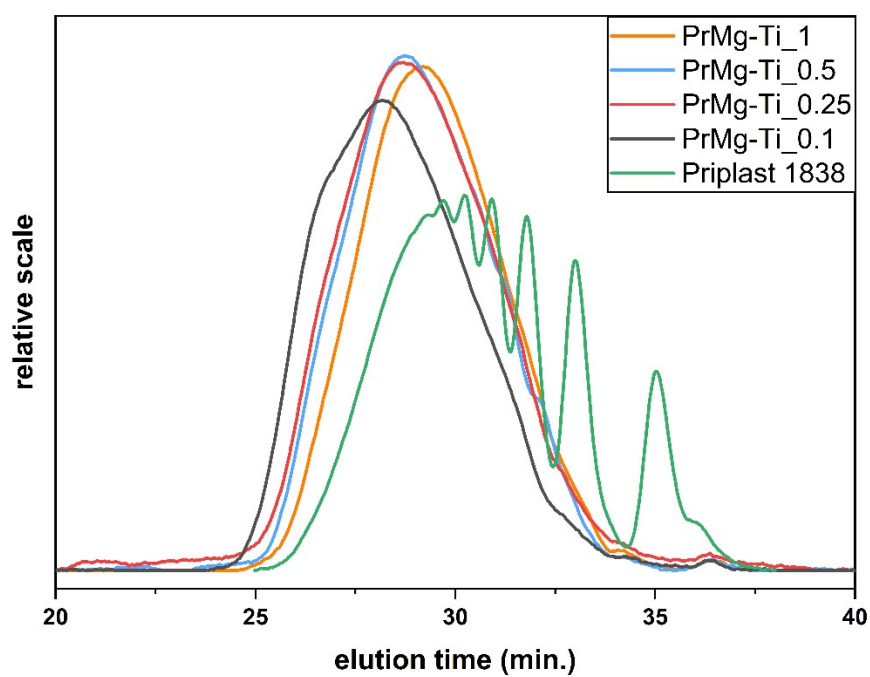

**Figure S7** GPC traces of the materials obtained with use of different catalyst concentrations.

**Table S1** Degree of acrylation

| Catalyst concentration (mol%) | $\delta_{u,w}$ (1H) | $\delta_a$ (4H) | Degree of Acrylation |
|-------------------------------|---------------------|-----------------|----------------------|
| 0.10                          | 3.40                | 100             | 0.136                |
| 0.25                          | 3.10                | 100             | 0.124                |
| 0.50                          | 4.89                | 100             | 0.196                |
| 0.75                          | 2.54                | 100             | 0.102                |
| 1.00                          | 2.04                | 100             | 0.082                |

**Table S2** DSC results

| Material     | $T_g$ [°C] | $\Delta C_p$ [J/g·°C] |
|--------------|------------|-----------------------|
| PrMg-Ti_0.1  | -51.6      | 0.331                 |
| PrMg-Ti_0.25 | -50.3      | 0.360                 |
| PrMg-Ti_0.5  | -51.9      | 0.399                 |
| PrMg-Ti_1    | -51.0      | 0.346                 |

**Table S3** Gel fraction ( $G_f$ ) of photocured polymer networks in air and in argon

| Material     | Gel fraction [%] |                |
|--------------|------------------|----------------|
|              | Cured in air     | Cured in argon |
| PrMg-Ti_0.1  | 65±3             | 66±4           |
| PrMg-Ti_0.25 | 57±2             | 60±1           |
| PrMg-Ti_0.5  | 75±1             | 76±2           |
| PrMg-Ti_1    | 45±2             | 48±2           |

**Table S4** Swelling test results of obtained thin films

| <b>Material</b> | <b>Swelling [%]</b> |                |
|-----------------|---------------------|----------------|
|                 | Cured in air        | Cured in argon |
| PrMg-Ti_0.1     | 435±23              | 353±3          |
| PrMg-Ti_0.25    | 503±10              | 450±5          |
| PrMg-Ti_0.5     | 382±8               | 308±3          |
| PrMg-T_1        | 488±7               | 434±10         |

**Table S5** DMTA results

| <b>Material</b> | <b>Curing atmosphere</b> | <b>T<sub>g</sub> (E''<sub>max</sub>) [°C]</b> | <b>T<sub>g</sub> (tan δ<sub>max</sub>) [°C]</b> | <b>E' at 37 °C [MPa]</b> | <b>E'' at 37°C [MPa]</b> | <b>Tan δ at 37 °C [MPa]</b> |
|-----------------|--------------------------|-----------------------------------------------|-------------------------------------------------|--------------------------|--------------------------|-----------------------------|
| PrMg-Ti         | Air                      | -36.9                                         | -28.1                                           | 0.078                    | 0.014                    | 0.14                        |
| _0.1            | Argon                    | -35.6                                         | -26.0                                           | 0.200                    | 0.067                    | 0.330                       |
| PrMg-Ti         | Air                      | -33.2                                         | -21.8                                           | 0.064                    | 0.021                    | 0.21                        |
| _0.25           | Argon                    | -36.6                                         | -28.3                                           | 0.450                    | 0.134                    | 0.296                       |
| PrMg-Ti         | Air                      | -38.9                                         | -30.4                                           | 0.045                    | 0.022                    | 0.022                       |
| _0.5            | Argon                    | -39.7                                         | -31.5                                           | 0.058                    | 0.031                    | 0.525                       |
| PrMg-Ti_1       | Air                      | -38.5                                         | -28.3                                           | 0.049                    | 0.014                    | 0.14                        |
|                 | argon                    | -38.6                                         | -29.5                                           | 0.017                    | -                        | -                           |

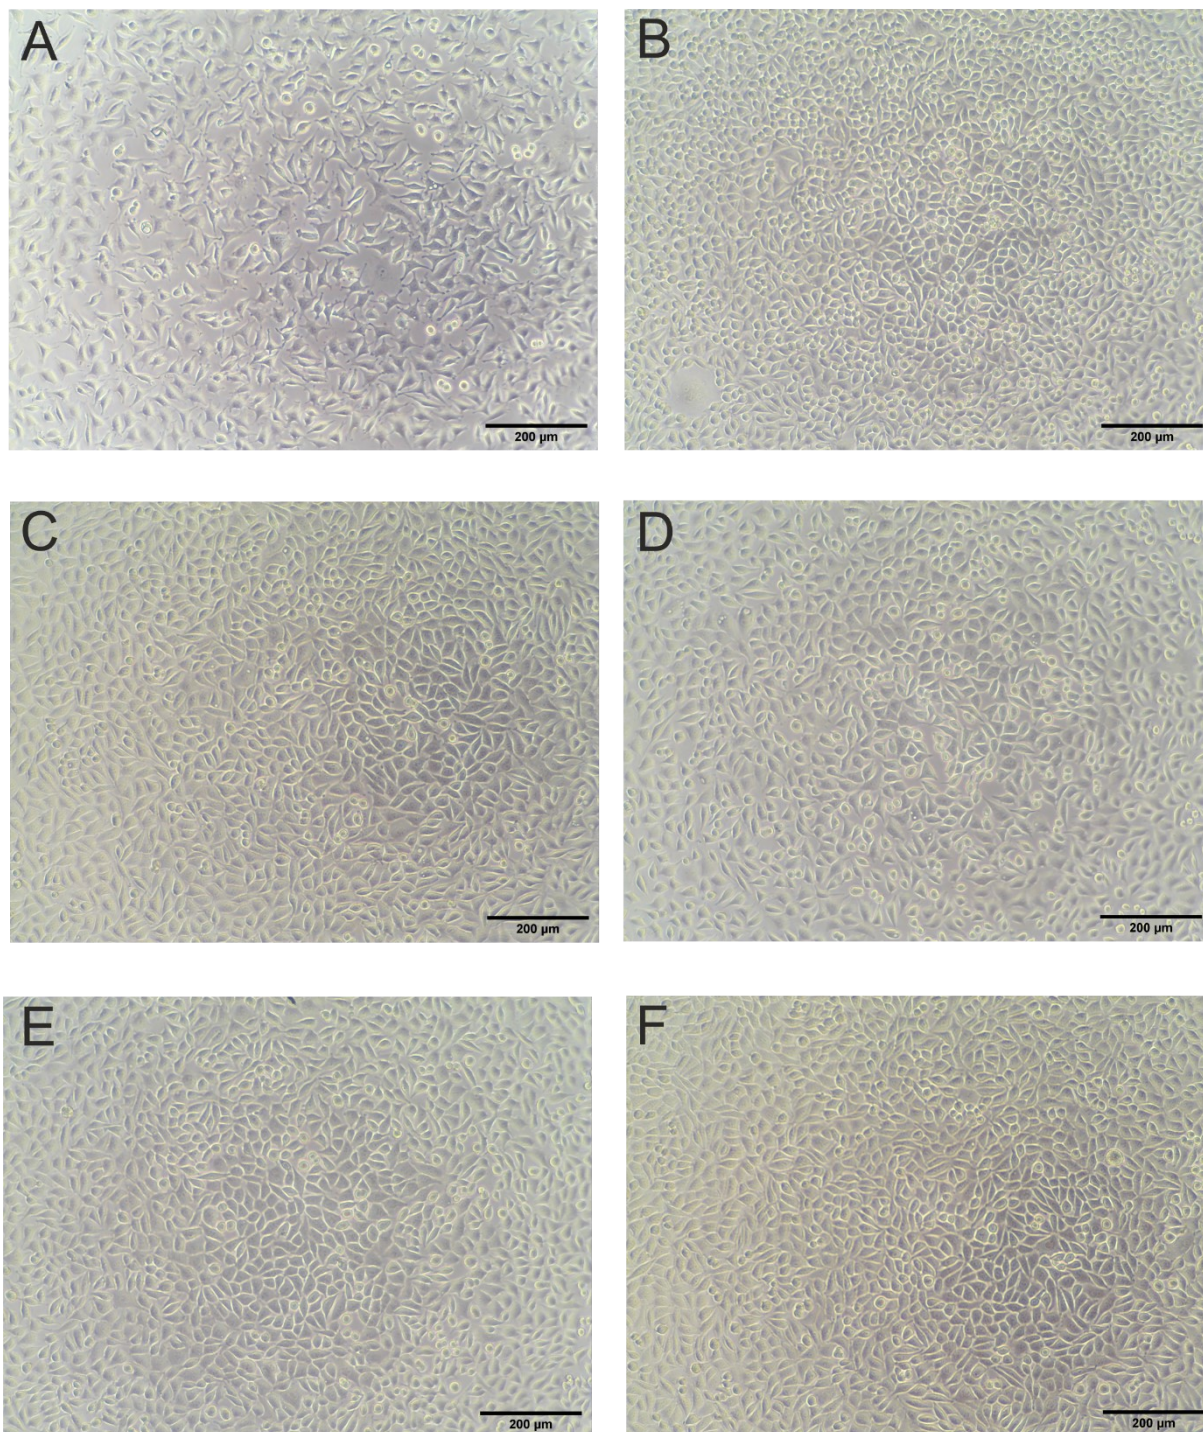

**Figure S8** Representative photomicrographs of L929 cells. A) 24 hours after seeding; B) after 24 hours of culture with sham extract; C) after 24 hours of culture with extract of PrMg-Ti\_0.1; D) after 24 hours of culture with extract of PrMg-Ti\_0.25; E) after 24 hours of culture with PrMg-Ti\_0.5; F) after 24 hours of culture with extract of PrMg-Ti\_1. All materials were crosslinked in air atmosphere. Scale bars represent 200 µm.
